# Supplementary material for: Comprehensive analysis of lncRNA expression profiles reveals a novel lncRNA signature to discriminate nonequivalent outcomes in patients with ovarian cancer
Source: PubMed Central journal article supplement (PMC5078024; doi:10.18632/oncotarget.8653), 2016-04-18
Supplement: oncotarget-07-32433-s001.pdf [file oncotarget-07-32433-s001.pdf]

# Comprehensive analysis of lncRNA expression profiles reveals a novel lncRNA signature to discriminate nonequivalent outcomes in patients with ovarian cancer

## SUPPLEMENTARY FIGURES AND TABLE

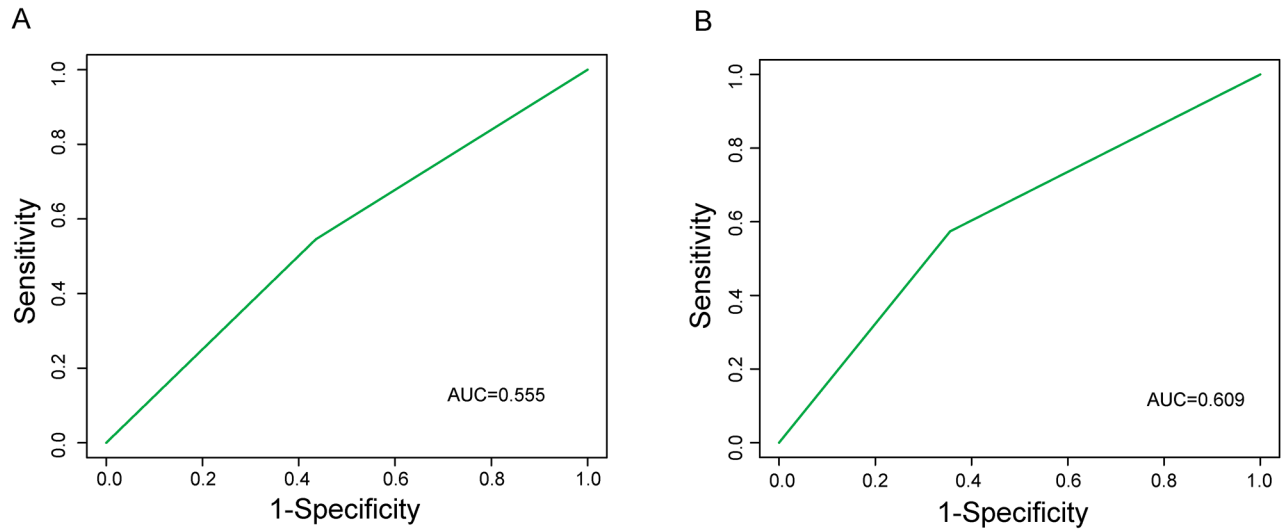

Supplementary Figure S1: The time-dependent ROC curves within 5 years for the eight-lncRNA signature in the validation cohort A. and in the entire TCGA cohort B.

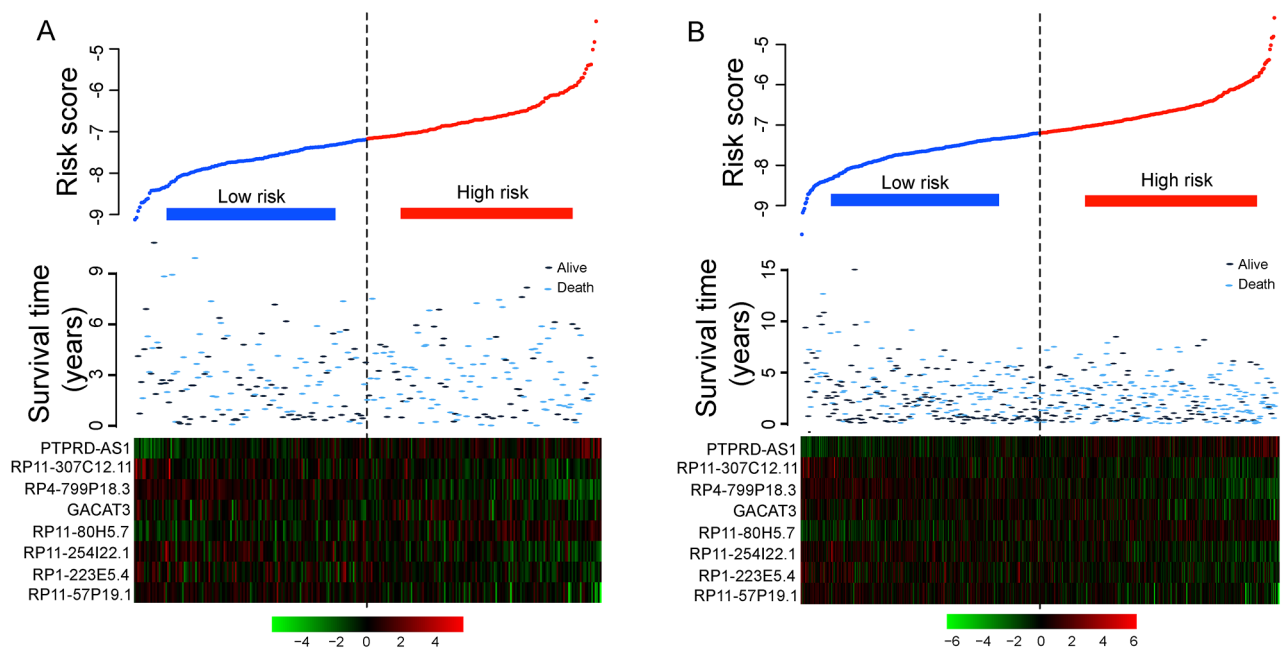

Supplementary Figure S2: The distribution of risk scores, survival status and lncRNA expression for patients in the validation cohort A. and in the entire TCGA cohort B.

**Supplementary Table S1: Detailed clinical information of OvCa patients enrolled in this study.**

**See Supplementary File 1**
